# Supplementary material for: BMI, Alcohol Consumption and Gut Microbiome Species Richness Are Related to Structural and Functional Neurological Abnormalities
Source: MDPI journal article supplement (doi:10.3390/nu13113743), 2021-10-23
Supplement: s1 [file s1]

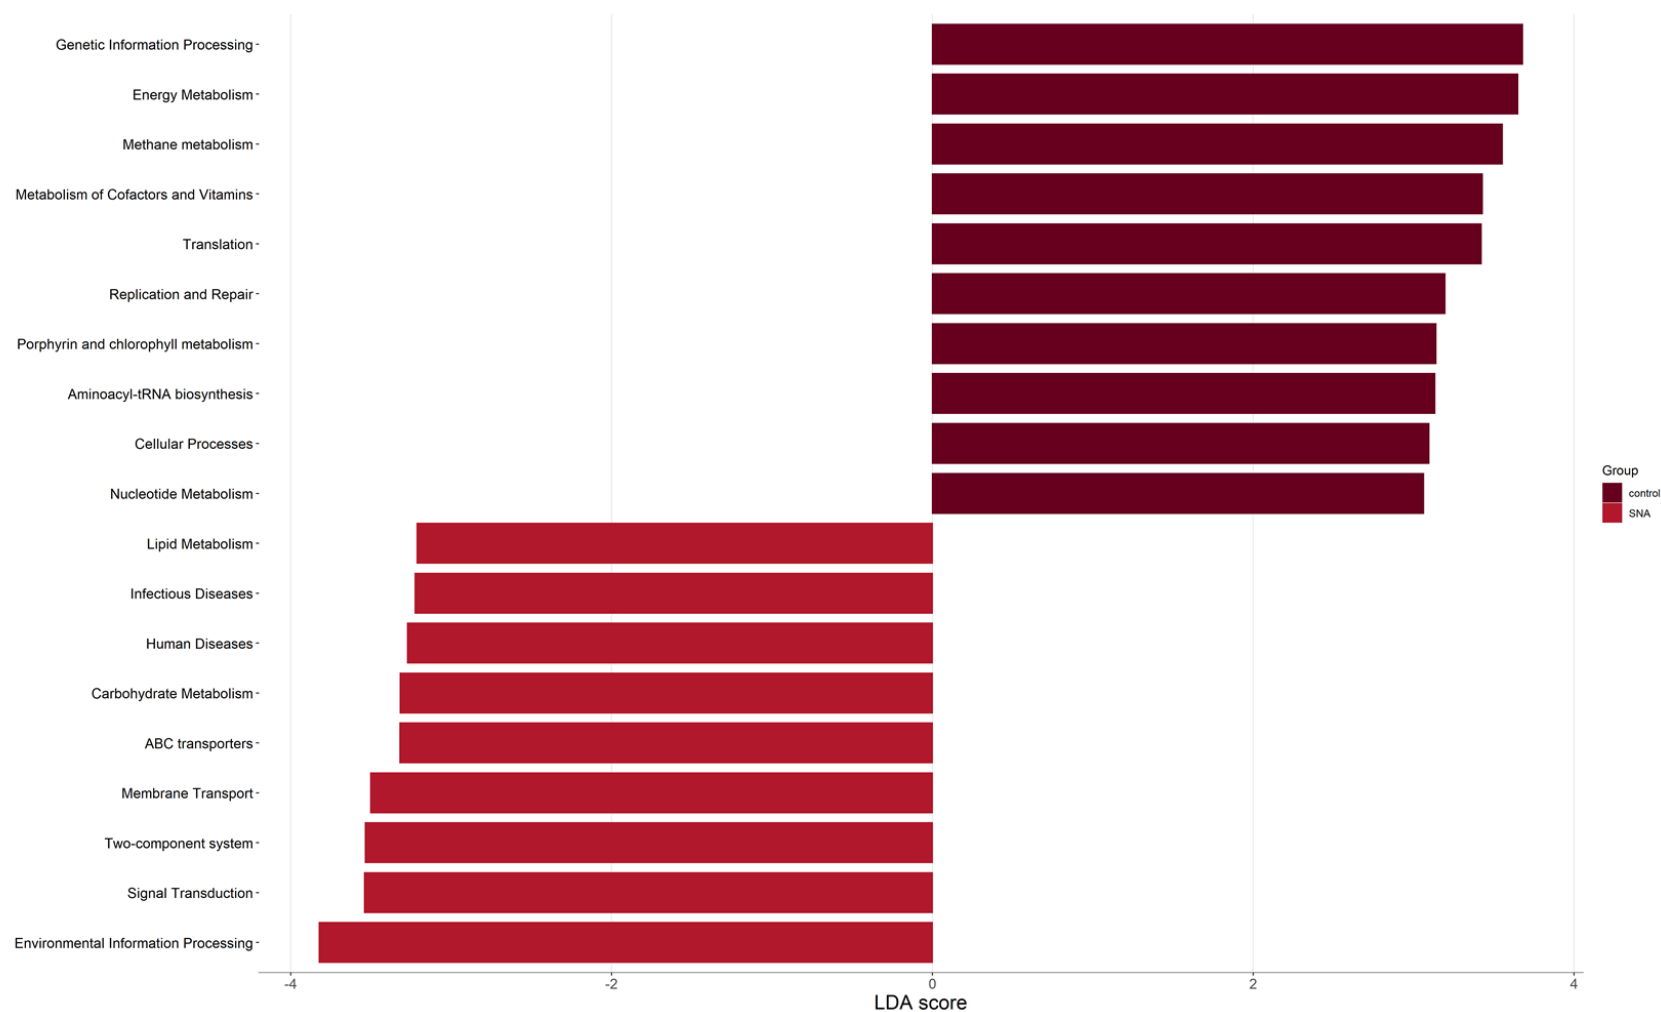

**Figure S2** Linear discriminant analysis (LDA) effect size (LEfSe) plot of functional pathways identified in the gut microbiome of subgroups and controls. The threshold for the LDA score was 3 ( $p < 5 \times 10^{-2}$ ). Figures and calculations were assessed by the “microeco” package (version 0.4.0) with the “Tax4Fun” package included in RStudio (version 0.3.1). SNA: structural neurological abnormalities.
