# Supplementary material for: BMI, Alcohol Consumption and Gut Microbiome Species Richness Are Related to Structural and Functional Neurological Abnormalities
Source: MDPI journal article supplement (doi:10.3390/nu13113743), 2021-10-23
Supplement: s1 [file s1]

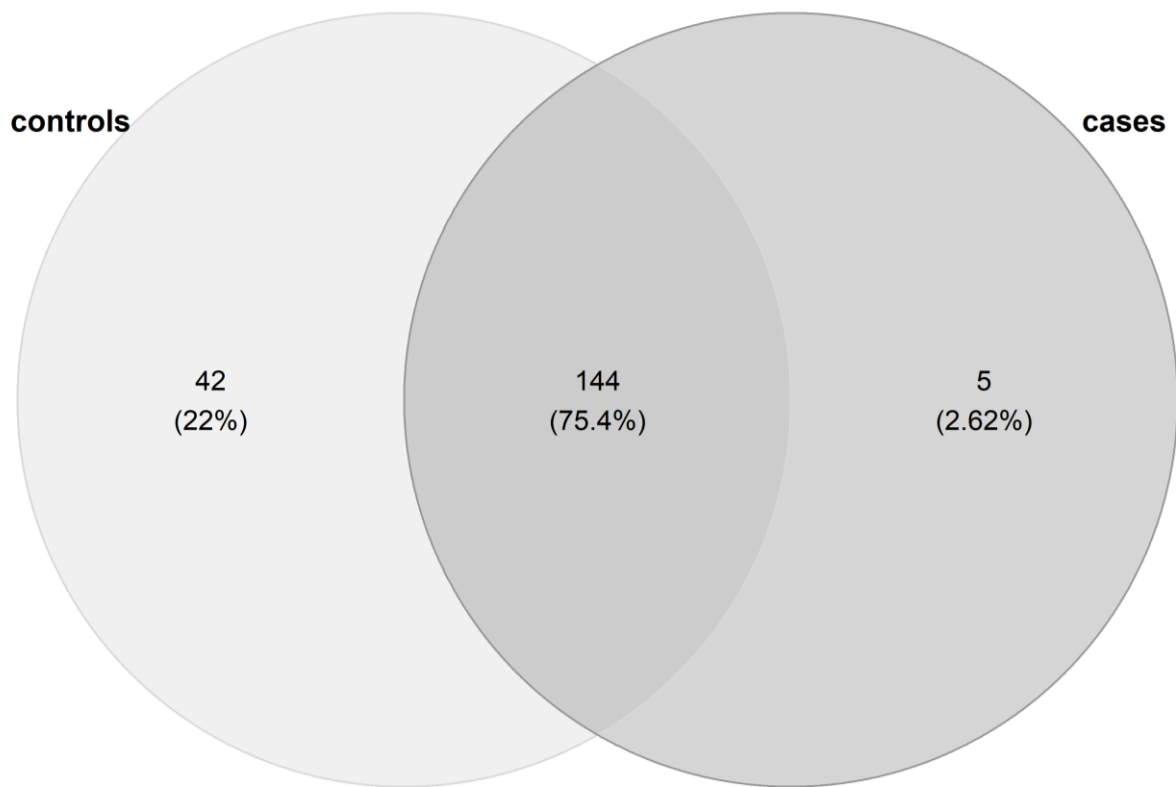

**Figure S1** Venn diagram of OTU occurrence in cases and controls (overlap of 144 OTUs, 5 OTUs (mainly *Proteobacteria*) and 42 OTUs (mainly *Firmicutes*) only observed in cases and controls).
