# Supplementary material for: BMI, Alcohol Consumption and Gut Microbiome Species Richness Are Related to Structural and Functional Neurological Abnormalities
Source: MDPI journal article supplement (doi:10.3390/nu13113743), 2021-10-23
Supplement: s1 [file s1]

**Table S1** Supplemental characterization of energy adjusted macro- and micronutrient intake between the groups.

|                                       | Cases (n=223)                 | Controls (n=568)    | All subjects (n=791) |
|---------------------------------------|-------------------------------|---------------------|----------------------|
| <b>Protein</b>                        |                               |                     |                      |
| Isoleucine, g/d                       | 3.65 (3.26/3.95) <sup>1</sup> | 3.62 (3.26/3.96)    | 3.60 (3.26/3.96)     |
| Leucine, g/d                          | 5.88 (5.27/6.35)              | 5.78 (5.26/6.38)    | 5.80 (5.26/6.38)     |
| Lysine, g/d                           | 5.07 (4.46/5.72)              | 5.02 (4.40/5.73)    | 5.03 (4.42/5.73)     |
| Threonine, g/d                        | 3.04 (2.75/3.32)              | 3.04 (2.74/3.38)    | 3.04 (2.74/3.37)     |
| Valine, g/d                           | 4.20 (3.80/4.51)              | 4.14 (3.78/4.57)    | 4.16 (3.78/4.56)     |
| Histidine, g/d                        | 2.01 (1.80/2.24)              | 1.99 (1.79/2.25)    | 2.00 (1.79/2.24)     |
| Alanine, g/d                          | 3.65 (3.17/4.11)              | 3.60 (3.21/4.03)    | 3.62 (3.20/4.05)     |
| <b>Fatty Acids</b>                    |                               |                     |                      |
| Butanoic acid/butyric acid, g/d       | 1.29 (1.08/1.54)              | 1.34 (1.09/1.63)    | 1.32 (1.09/1.59)     |
| Hexanoic acid/caproic acid, g/d       | 0.76 (0.62/0.92)              | 0.79 (0.63/0.97)    | 0.76 (0.62/0.92)     |
| Octanoic acid/caprylic acid, g/d      | 0.72 (0.62/0.80)              | 0.73 (0.62/0.81)    | 0.72 (0.62/0.81)     |
| Decanoic acid/capric acid, g/d        | 1.12 (0.96/1.29)              | 1.16 (0.97/1.35)    | 1.11 (0.97/1.29)     |
| Dodecanoic acid/lauric acid, g/d      | 2.33 (2.03/2.63)              | 2.33 (2.07/2.62)    | 2.33 (2.03/2.63)     |
| Tetradecanoic acid/myristic acid, g/d | 4.69 (4.02/5.35)              | 4.79 (4.13/5.49)    | 4.69 (4.02/5.35)     |
| Pentadecanoic acid, g/d               | 0.41 (0.34/0.50)              | 0.43 (0.34/0.52)    | 0.41 (0.35/0.49)     |
| Hexadecanoic acid/palmitic acid, g/d  | 19.02 (17.29/21.14)           | 19.26 (17.55/21.03) | 19.21 (17.42/21.06)  |
| Heptadecanoic acid, g/d               | 0.35 (0.29/0.41)              | 0.36 (0.29/0.43)    | 0.36 (0.29/0.42)     |
| Octadecanoic acid/stearic acid, g/d   | 8.10 (7.27/9.08)              | 8.17 (7.36/8.92)    | 8.16 (7.33/8.94)     |
| Eicosanoic acid/arachinic acid, g/d   | 0.38 (0.34/0.41)              | 0.37 (0.33/0.41)    | 0.38 (0.34/0.41)     |
| Decosanoic acid, g/d                  | 0.11 (0.08/0.14)              | 0.09 (0.08/0.13)    | 0.10 (0.08/0.13)     |
| Teracosanoic acid, g/d                | 0.02 (0.02/0.03)              | 0.02 (0.02/0.03)    | 0.02 (0.02/0.03)     |
| Octadecenoic acid/oleic acid, (g/day) | 29.59 (27.09/32.67)           | 29.58 (26.71/32.47) | 29.59 (26.78/32.50)  |
| <b>Dietary fiber</b>                  |                               |                     |                      |
| Poly-hexoses, g/d                     | 6.71 (5.94/7.58)              | 6.55 (5.82/7.42)    | 6.58 (5.86/7.48)     |
| Poly-pentoses, g/d                    | 5.14 (4.42/6.19)              | 5.20 (4.30/6.15)    | 5.18 (4.33/6.18)     |
| Poly-uronic acid, g/d                 | 3.65 (2.90/4.81)              | 3.48 (2.73/4.44)    | 3.52 (2.77/4.53)     |
| Cellulose, g/d                        | 4.68 (3.95/5.79)              | 4.67 (3.92/5.52)    | 4.67 (3.93/5.58)     |
| Lignin, g/d                           | 1.36 (1.15/1.65)              | 1.32 (1.11/1.60)    | 1.33 (1.11/1.61)     |

<sup>1</sup> Median (25th and 75th percentiles); \*statistical significance was tested using Mann-Whitney U test; ( $p < 5 \times 10^{-2}$ ).
